# Supplementary material
Source: PubMed Central journal article supplement (PMC3164231)
Supplement: la202033p_si_001.pdf [file la202033p_si_001.pdf]

**SUPPLEMENTARY INFORMATION TO**

**Mechanisms and kinetics of CO<sub>2</sub> uptake on bicontinuous mesoporous silica modified with  
n-propylamine**

*Zoltán Bacsik<sup>1</sup>, Nanna Ahlsten<sup>2</sup>, Asraa Ziadi<sup>2</sup>, Guoying Zhao<sup>1</sup>, Alfonso E. Garcia-Bennett<sup>3</sup>, Belén  
Martín-Matute<sup>2</sup>, Niklas Hedin<sup>1\*</sup>*

<sup>1</sup>Department of Materials and Environmental Chemistry, Berzelii Center EXSELENT on Porous  
Materials, Arrhenius Laboratory, Stockholm University, SE-106 91 Stockholm, Sweden

<sup>2</sup>Department of Organic Chemistry, Berzelii Center EXSELENT on Porous Materials, Arrhenius  
Laboratory, Stockholm University, SE-106 91 Stockholm, Sweden

<sup>3</sup>Nanotechnology and Functional Materials, Department of Engineering Sciences, The Ångström  
Laboratory, Uppsala University, Box 534, SE-751 21 Uppsala, Sweden

[niklas.hedin@mmk.su.se](mailto:niklas.hedin@mmk.su.se)

## Functionalization of AMS-6 with 3-aminopropyl triethoxysilane

AMS-6 was dried in an oven for 20 h at 150 °C before modification. A suspension of AMS-6 (300 mg) in toluene (18 mL) was stirred at 50 °C for 30 min under argon in a closed tube. The tube was opened and water (68 µL, 3.78 mmol) was added dropwise to the mixture. After resealing the tube, the mixture was heated to 120 °C for 1.5 h, after which 3-aminopropyltriethoxysilane (2.54 g, 11.4 mmol) was added to the mixture. When the addition was complete, the tube was closed and heated at 120 °C for 72 h. After cooling to room temperature, the tube was opened and the solid was filtered and washed with toluene (3 x 10 mL) and free residual 3-aminopropyltriethoxysilane was removed by soxhlet extraction in EtOH. The resulting solid was dried under reduced pressure over night. Anal. C, 15.17; H, 3.67; N, 4.85. Functionalization with 3-aminopropylmethyldiethoxysilane was performed in a similar manner. Functionalization of MCM-48 3-aminopropyltriethoxysilane and 3-aminopropylmethyldiethoxysilane were performed in a similar manner.

## Surface area of AMS-6 in a powder and pellet form

AMS-6. The adsorption isotherms measured on the powder and pellet were practically equivalent proving that no structural collapse of the pore system occurred due to the pellet pressing.

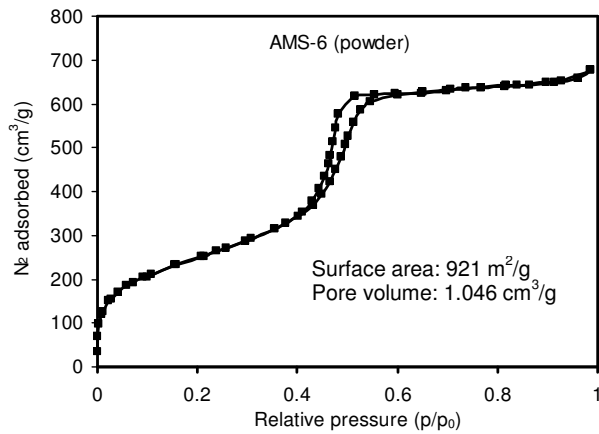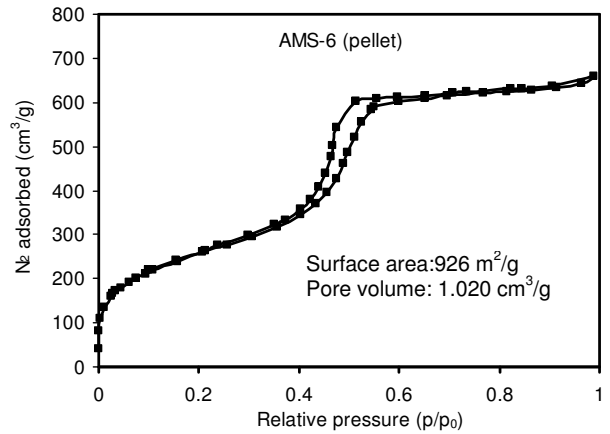

**Table S1.** Identification of the species formed by the reaction of CO<sub>2</sub> and immobilized amine groups with in situ IR spectroscopy

| Reference      | Adsorbent*                            | IR technique           | Sample preparation    | Model gas                                              | Assignment, compounds (wavenumber in cm <sup>-1</sup> )<br>(No water present)                                                                                                           | Assignment, compounds (wavenumber in cm <sup>-1</sup> ) (In the presence of water)                                                                                                                     |
|----------------|---------------------------------------|------------------------|-----------------------|--------------------------------------------------------|-----------------------------------------------------------------------------------------------------------------------------------------------------------------------------------------|--------------------------------------------------------------------------------------------------------------------------------------------------------------------------------------------------------|
| Tsuda, 1992    | silica gel/APTES                      | Simple IR (no in situ) | No preparation        | CO <sub>2</sub> in N <sub>2</sub>                      | Ammonium carbamate (1580, 1330)                                                                                                                                                         | -                                                                                                                                                                                                      |
| Chang, 2003    | SBA-15/APTES                          | DRIFT                  | He flow, 25 °C, 1h    | 4 % CO <sub>2</sub> in He, 2.5 % H <sub>2</sub> O      | bidentate bicarbonate (1634), bidentate carbonate (1575, 1390), monodentate bicarbonate (1493, 1432), monodentate carbonate (1335)                                                      | The same as in dry experiments.                                                                                                                                                                        |
| Khatri, 2005   | SBA-15/N-(2-aminoethyl)-3-aminopropyl | DRIFT                  | He flow, 30 °C, 2h    | 10% CO <sub>2</sub> , 4% H <sub>2</sub> O in He        | -                                                                                                                                                                                       | bidentate bicarbonate (1628), bidentate carbonate (1541), monodentate bicarbonate (1470, 1422), monodentate carbonate (1337), carbamic acid (1287), non-discussed band at around 1700 cm <sup>-1</sup> |
| Khatri, 2006   | SBA-15/APTES                          | DRIFT                  | N/A                   | 10 % CO <sub>2</sub> and 4 % D <sub>2</sub> O in Ar    | -                                                                                                                                                                                       | Bicarbonates and carbonates (shifted band position due to hydrogen/deuterium isotope change)                                                                                                           |
| Fisher, 2009   | B Zeolite/TEPA                        | DRIFT                  | He flow, 135 °C, 0.5h | 10 % CO <sub>2</sub> in Ar                             | bidentate carbonate (1564, 1390), monodentate bicarbonate (1470) monodentate carbonate (1313)                                                                                           | -                                                                                                                                                                                                      |
| Tanthana, 2010 | TEPA/SiO <sub>2</sub>                 | DRIFT                  | Ar flow, 55 °C        | 15% CO <sub>2</sub> , 4% H <sub>2</sub> O in air       | -                                                                                                                                                                                       | CO <sub>2</sub> -H <sub>2</sub> N- (2627), carbamic acid (1680), carbamate (1520), carboxylate (1430), carboxylate and carbamate (1315)                                                                |
| Hao, 2010      | Silica (AMS)/APTES                    | N/A                    | N/A                   | N/A                                                    | NH stretch in carbamate (3410), NH <sub>3</sub> <sup>+</sup> def in carbamate (1632), C=O stretch in carbamate (1563), NCOO (1484),                                                     | -                                                                                                                                                                                                      |
| Leal, 1995     | Silica gel/APTES                      | Transm.                | 150 °C, 2 h           | 10 Torr dry and humid CO <sub>2</sub>                  | Carbamate (1411), bicarbonate (1385)                                                                                                                                                    | The ratio of carbamate (1411) and bicarbonate (1385) changes compare to dry CO <sub>2</sub>                                                                                                            |
| Huang, 2003    | MCM-48/APTES                          | Transm.                | He-flow, N/A          | 5% CO <sub>2</sub> in He                               | Bicarbonate (1382)((after Leal et al.)), C=O asym. Stretch (1432, 1485) in carbamate, C-O stretch and NH <sub>3</sub> <sup>+</sup> def. (1560), NH <sub>3</sub> <sup>+</sup> def (1635) | Higher overall intensity of the same bands as in case of dry CO <sub>2</sub>                                                                                                                           |
| Wang, 2009     | SBA-15/PEI                            | Transm.                | He flow, 80 °C, 2h    | For moist CO <sub>2</sub> runs: preadsorption of water | NH <sub>3</sub> <sup>+</sup> def (1630) and C=O stretch (1520) and NCOO (1410, 1320) in carbamate, chemisorbed CO <sub>2</sub> (2450, 2160)                                             | Slightly higher uptake, same bands as in case of dry CO <sub>2</sub> , no bicarbonate formation observed                                                                                               |

|               |                                               |         |                                                      |                                                                                      |                                                                                                                                                                                                                                                                                                              |                                                                                                                         |
|---------------|-----------------------------------------------|---------|------------------------------------------------------|--------------------------------------------------------------------------------------|--------------------------------------------------------------------------------------------------------------------------------------------------------------------------------------------------------------------------------------------------------------------------------------------------------------|-------------------------------------------------------------------------------------------------------------------------|
| Zheng, 2005   | SBA-15/Ethylene diamine                       | Transm. | Ar flow, 135 °C                                      | Pure CO <sub>2</sub> and CO <sub>2</sub> / 2 % H <sub>2</sub> O                      | NH <sub>2</sub> <sup>+</sup> , NH def, C-N (1576) in intramolecular carbamate                                                                                                                                                                                                                                | The same bands as in case of dry CO <sub>2</sub>                                                                        |
| Hiyoshi, 2005 | SBA-15/APTES                                  | Transm. | He flow, 150 °C, 1h                                  | 3% CO <sub>2</sub> , in He, and 3% CO <sub>2</sub> , 2 % H <sub>2</sub> O in He      | NH stretch (3439) and NH <sub>3</sub> <sup>+</sup> (1630) and C=O stretch (1563) and NCOO (1488) in carbamate                                                                                                                                                                                                | The same bands as in case of dry CO <sub>2</sub>                                                                        |
| Knöfel, 2009  | Amorph. Silica/APTES                          | Transm. | Evacuation <10 <sup>-7</sup> mbar, 160 °C, overnight | Pure CO <sub>2</sub> (?)                                                             | NH stretch (3435), NH <sub>3</sub> <sup>+</sup> (1626), COO <sup>-</sup> asym (1545), NH <sub>3</sub> <sup>+</sup> (1487) bend and COO <sup>-</sup> sym (1381) in carbamate, C=O stretch in carbamic acid (1680) Faster formation of carbamic acid observed.                                                 | -                                                                                                                       |
| Bacsik, 2010  | Mesocaged silica/APTES                        | Transm. | Evacuation <10 <sup>-6</sup> Torr, 140 °C, 6h        | 100 % CO <sub>2</sub>                                                                | Physisorbed linear CO <sub>2</sub> (2340); NH stretch (3440), NH <sub>3</sub> <sup>+</sup> (1626), COO <sup>-</sup> asym (1567), NH <sub>3</sub> <sup>+</sup> (1500) NCOO <sup>-</sup> (1381) in carbamate; C=O stretch in carbamic acid (~1701)                                                             | -                                                                                                                       |
| Danon, 2011   | SBA-15/APTES with different surface coverages | DRIFT   | Evacuation <10 <sup>-7</sup> Torr, 100 °C            | Pure CO <sub>2</sub> , 20 Torr                                                       | Physisorbed linear CO <sub>2</sub> (2340); NH <sub>3</sub> <sup>+</sup> (1625), COO <sup>-</sup> asym (1564), NH <sub>3</sub> <sup>+</sup> (1485-1550) NCOO <sup>-</sup> (1335-1430) in carbamate; C=O stretch in carbamic acid (~1701)                                                                      | -                                                                                                                       |
| This study    | MCM-48/APTES<br>AMS-6/APTES                   | Transm. | Evacuation <10 <sup>-6</sup> Torr, 140 °C, 6h        | 20 V/V% CO <sub>2</sub> in N <sub>2</sub> , the same saturated with H <sub>2</sub> O | NH str. (3440), NH <sub>3</sub> <sup>+</sup> (1630), COO <sup>-</sup> asym (1564), NH <sub>3</sub> <sup>+</sup> (1484) bend. and COO <sup>-</sup> sym (1433), C=O stretch in H-bonded carbamic acid (1680-1700), C=O stretch (1715) in carbamic acid silyl ester (See Table 2 in the paper for more details) | Carbamic acid silyl ester does not form; the ammonium carbamate ion pair formation is enhanced in the present of water. |

\* In many studies there are more than one adsorbent investigated, here we refer the selected one(s) (silica support/amine)

## FIGURES

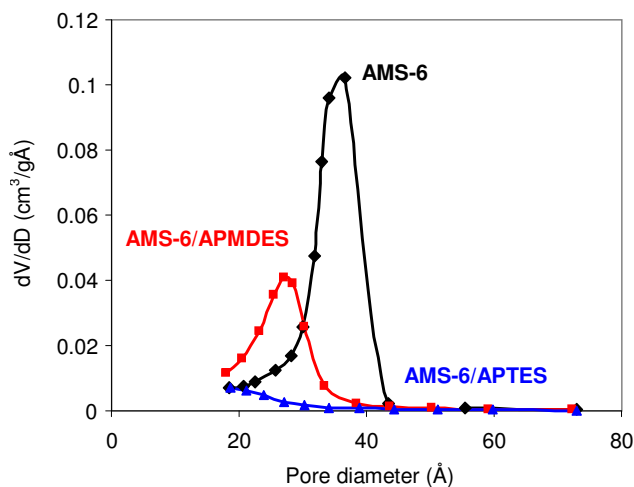

**Figure S1A.** Pore volume distribution in unmodified AMS-6, AMS-6/APMDES and AMS-6/APTES. The pore volume distribution (BJH model, desorption) is shifted towards smaller average pore dimensions as the degree of functionalization is increasing.

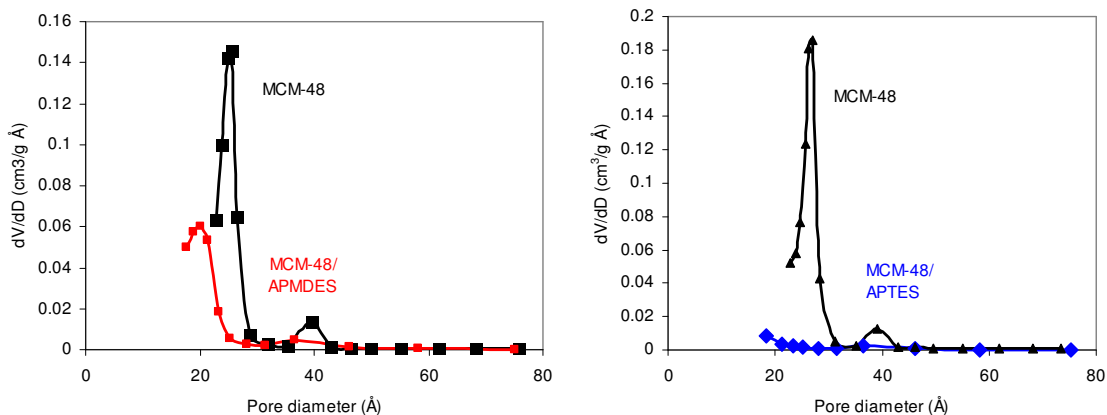

**Figure S1B.** Pore volume distribution in unmodified MCM-48, MCM-48/APMDES and MCM-48/APTES. The pore volume distribution (BJH model, desorption) is shifted towards smaller average pore dimensions as the degree of functionalization is increasing.

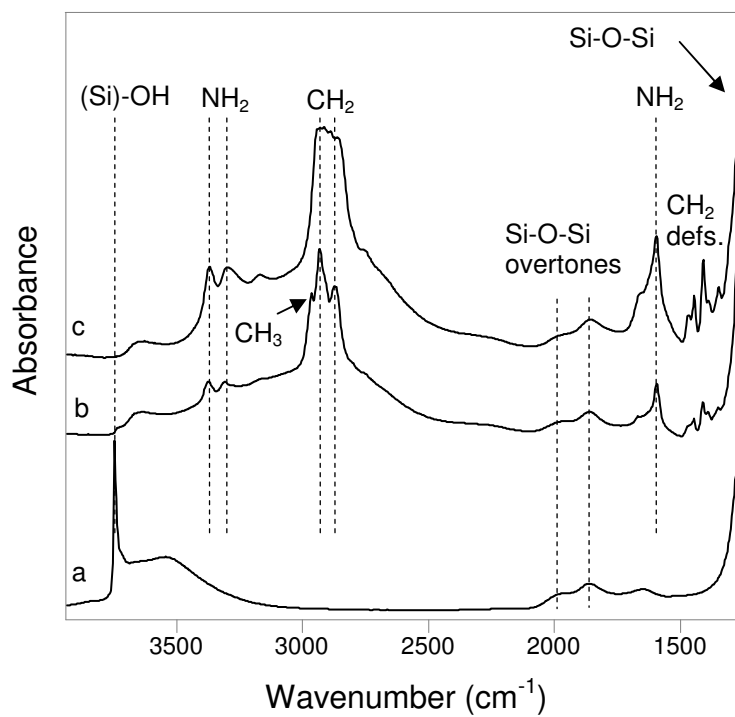

**Figure S2.** FTIR spectra of the a) AMS-6, b) AMS-6/APMDES and c) AMS-6/APTES. The spectra were measured in vacuum ( $<10^{-6}$  Torr) after pretreatment (140 °C,  $<10^{-6}$  Torr, 6 h) of the self-supporting pellets. An empty cell was used as background.

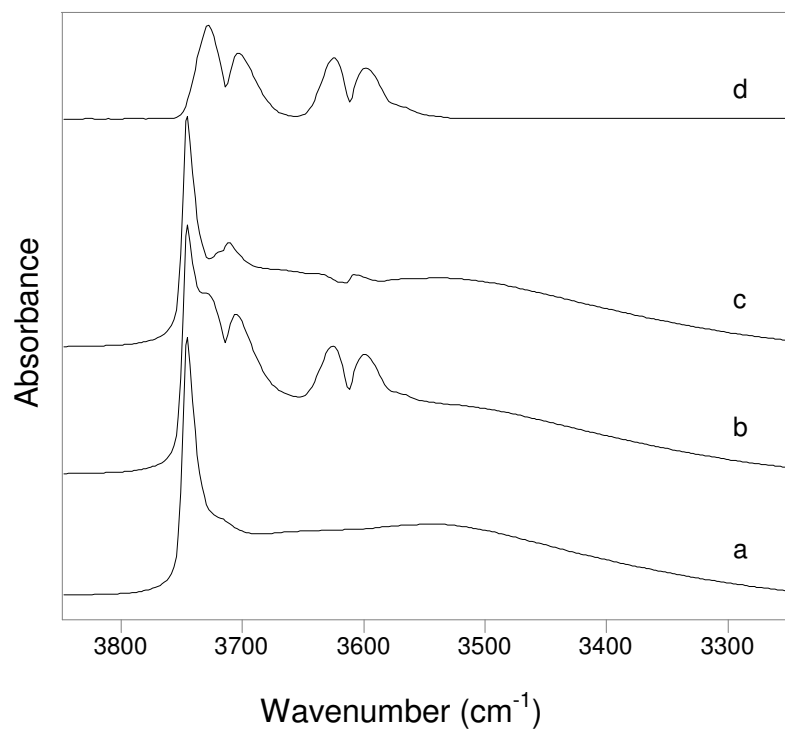

**Figure S3.** FTIR spectra of AMS-6 material a) measured in near vacuum conditions ( $<10^{-6}$  Torr) after heat treatment at 140 °C, b) contacted with 760 Torr of pure CO<sub>2</sub>, c) after subtraction of the corresponding gaseous reference spectrum for CO<sub>2</sub> and (d) the corresponding gaseous reference spectrum for CO<sub>2</sub>.

Spectra were measured at room temperature and the background spectrum was recorded in the empty cell. The changes in the OH-stretchings could not be detected when using this particular background spectrum.



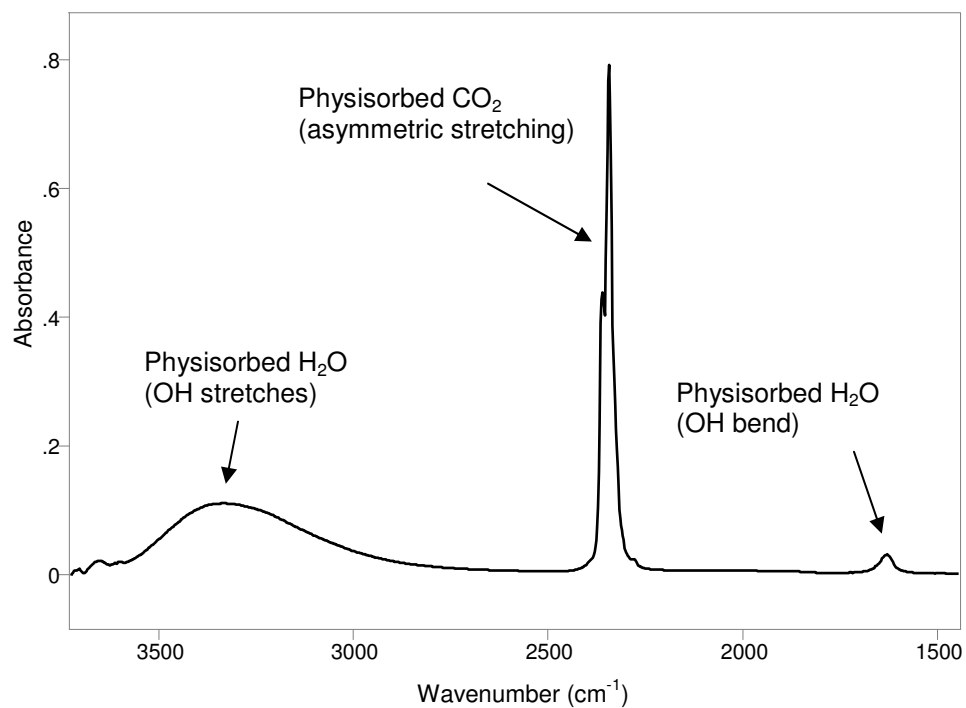

**Figure S4.** In situ FTIR spectrum of the adsorbed species on AMS-6 equilibrated with 400 Torr pure CO<sub>2</sub> saturated with water (2.1 V/V %). No carbonates or bicarbonates were observed.

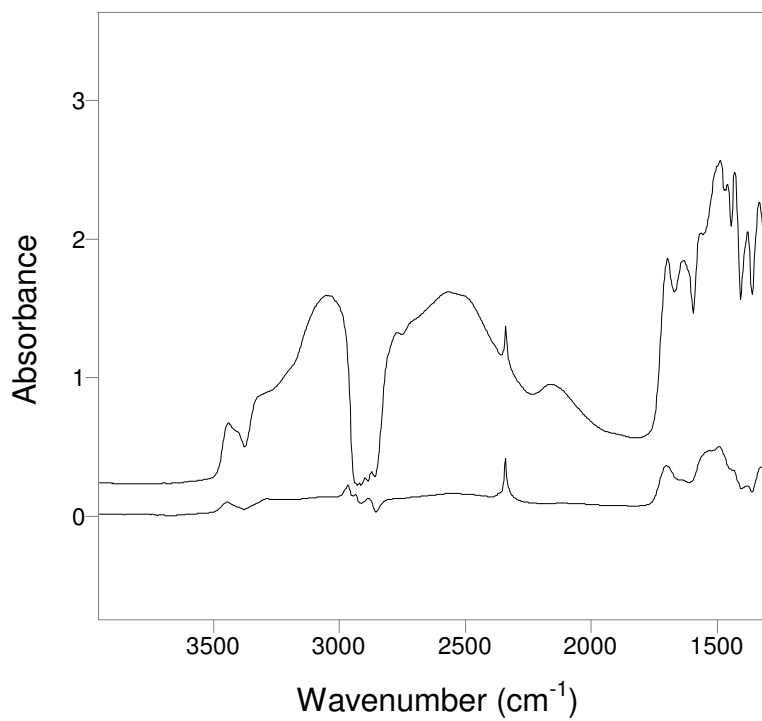

**Figure S5.** In situ FTIR spectra for AMS-6/APMDES and AMS-6/APTES contacted with 100 Torr of pure CO<sub>2</sub>.

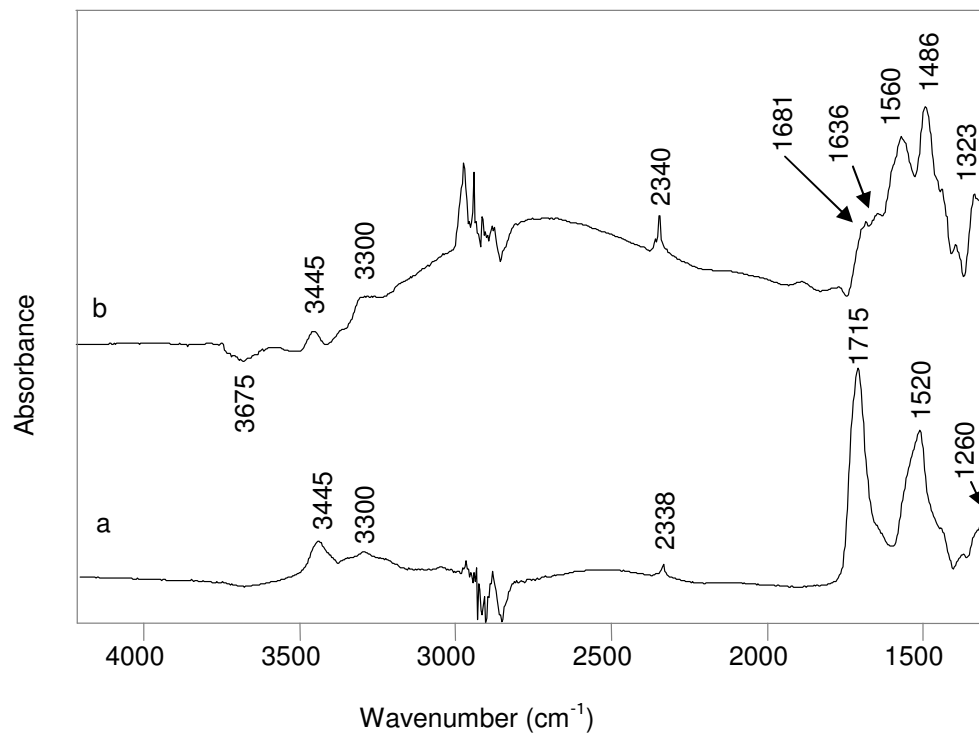

**Figure S6.** Differential IR spectra of the two major species form at different reaction rates during the adsorption of CO<sub>2</sub> on AMS-6/APMDES material: a) represents mainly silylpropylcarbamate. It is the difference spectrum of adsorbed species at 50 Torr CO<sub>2</sub> (20 V/V% in N<sub>2</sub>) measured after 2 and 25 minutes (equilibrium); b) represents mainly propylammonium propylcarbamate and hydrogen bonded carbamic acid. It is the difference spectrum of the 50 Torr equilibrium spectrum and the difference spectrum Figure 8a (residual).

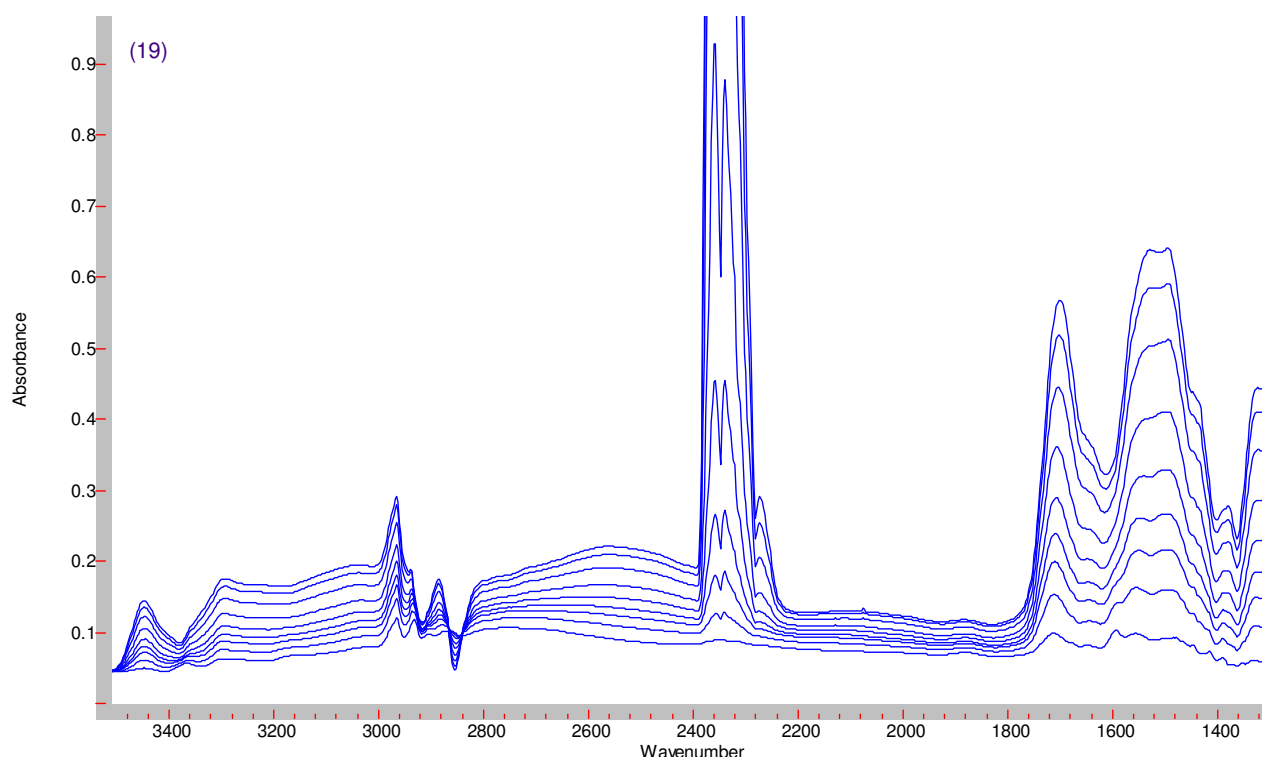

**Figure S7A. ADSORPTION AMS-6/APMDES, DRY CO<sub>2</sub> in N<sub>2</sub>, 2, 10, 25, 50, 100, 200, 400, 600, 760 Torr pressures (from bottom to top).**

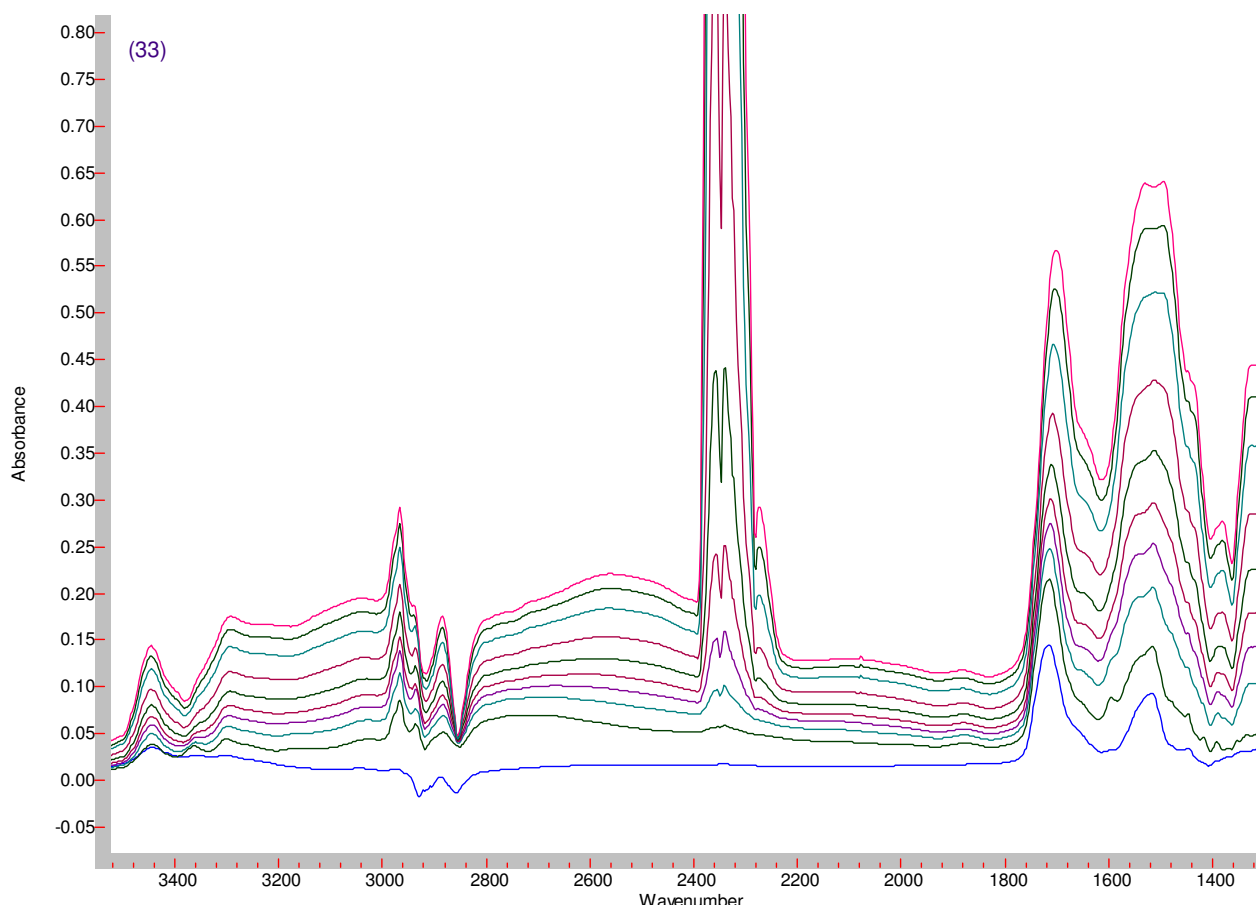

**Figure S7B. DESORPTION AMS-6/APMDES DRY 20 % CO<sub>2</sub> in N<sub>2</sub> pressure 760, 600, 400, 200, 100, 50, 25, 10, 1 Torr, 30 min evacuation (from top to bottom)**

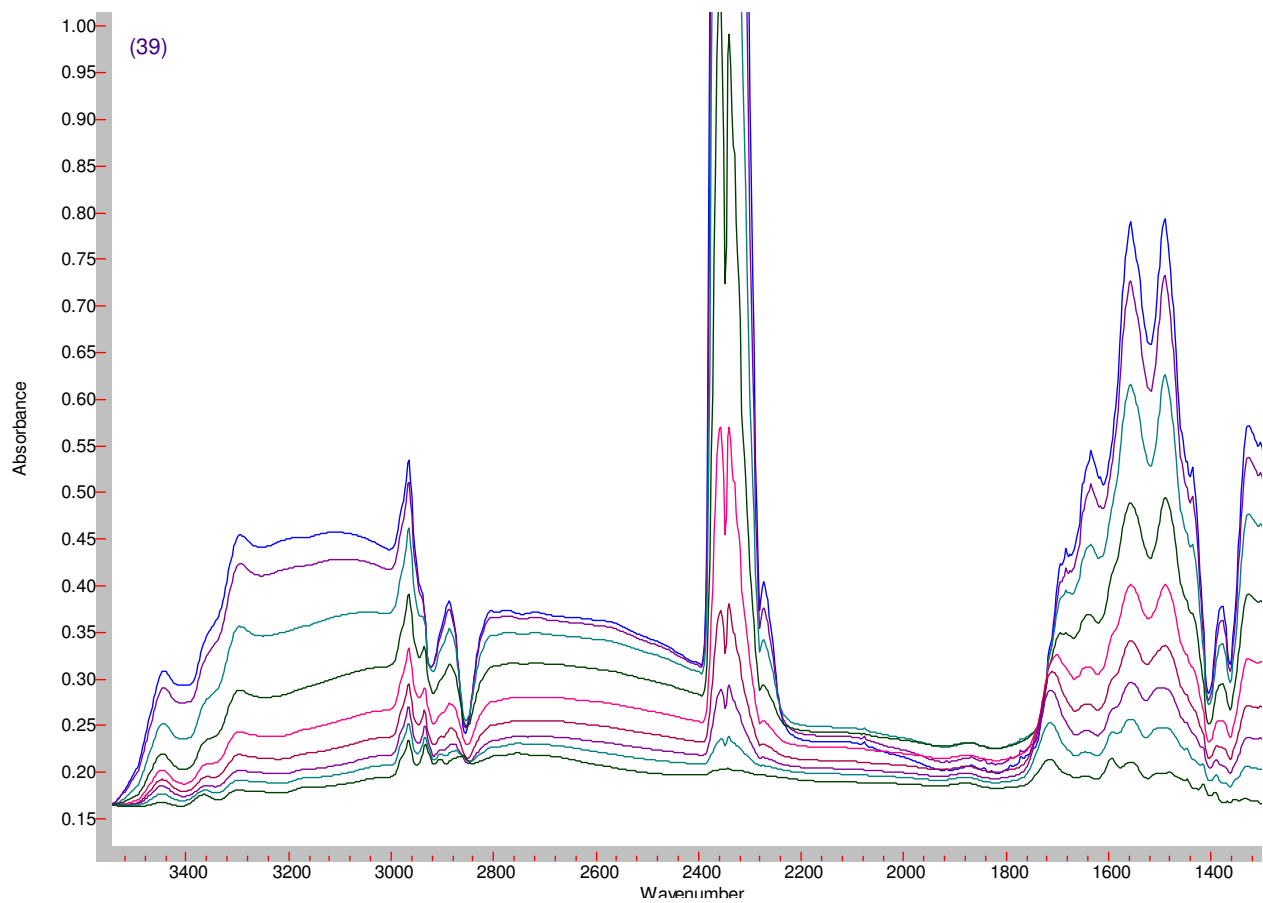

**Figure S7C. ADSORPTION AMS-6/APMDES, HUMID CO<sub>2</sub> in N<sub>2</sub>, 2, 10, 26, 50, 100, 200, 400, 600, 760 Torr pressures (from bottom to top)**

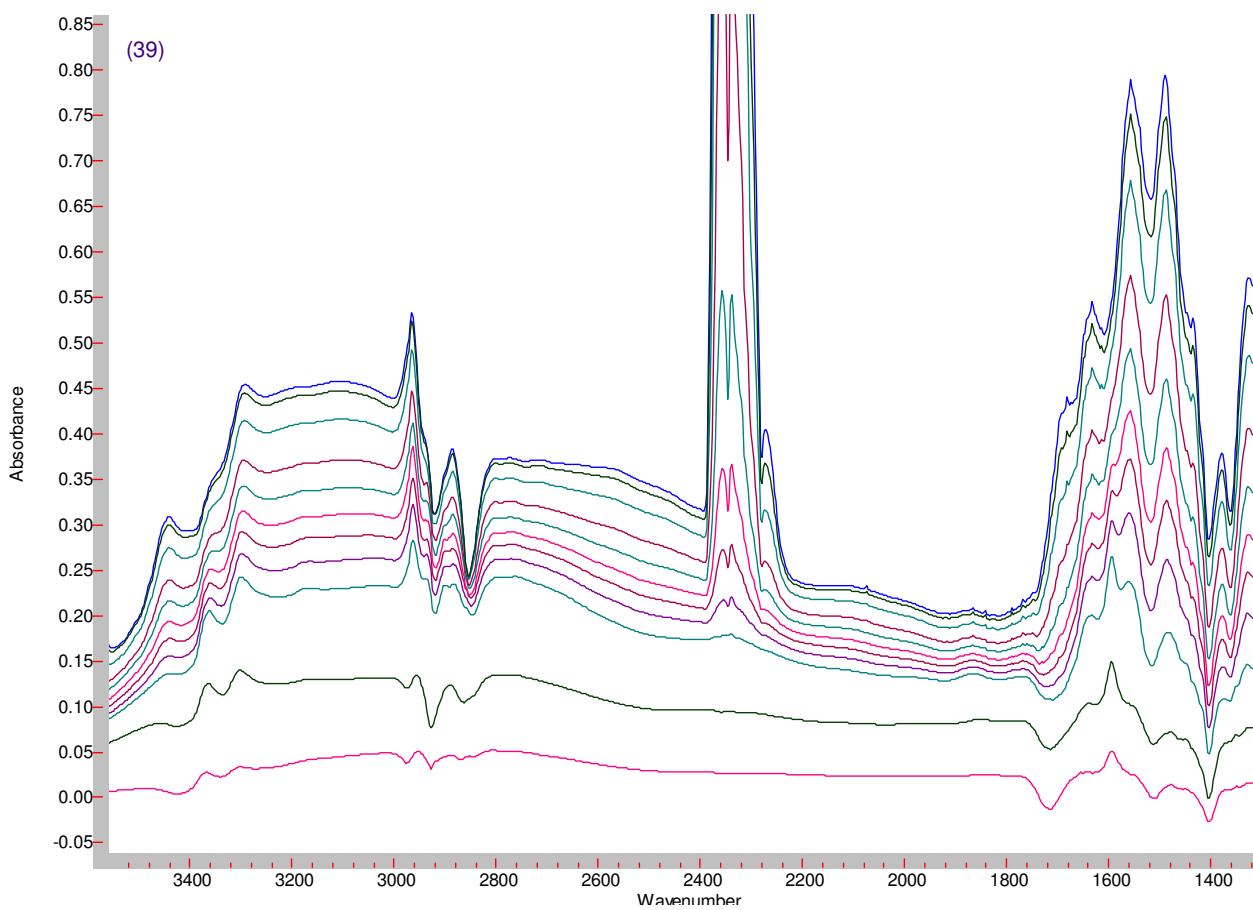

**Figure S7D. DESORPTION AMS-6/APMDES HUMID 20 % CO<sub>2</sub> in N<sub>2</sub> pressure 760, 600, 400, 200, 100, 50, 25, 10, 2 Torr, 30 min evacuation, after heat treatment (from top to bottom)**

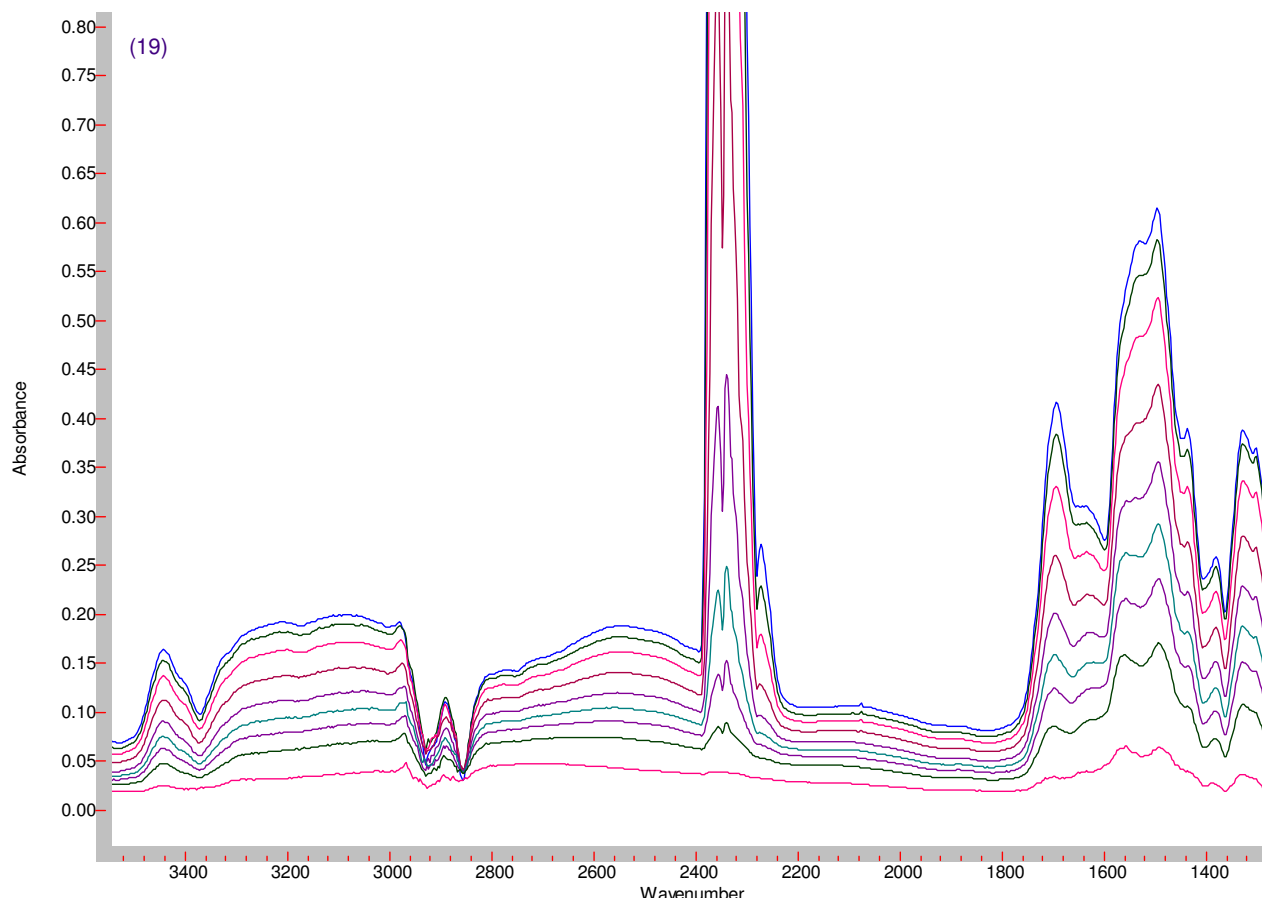

**Figure S8A. ADSORPTION** MCM-48/APMDES **DRY** 20 % CO<sub>2</sub> in N<sub>2</sub> pressure 1, 10, 25, 50, 100, 200, 400, 600, 760 Torr (from bottom to top)



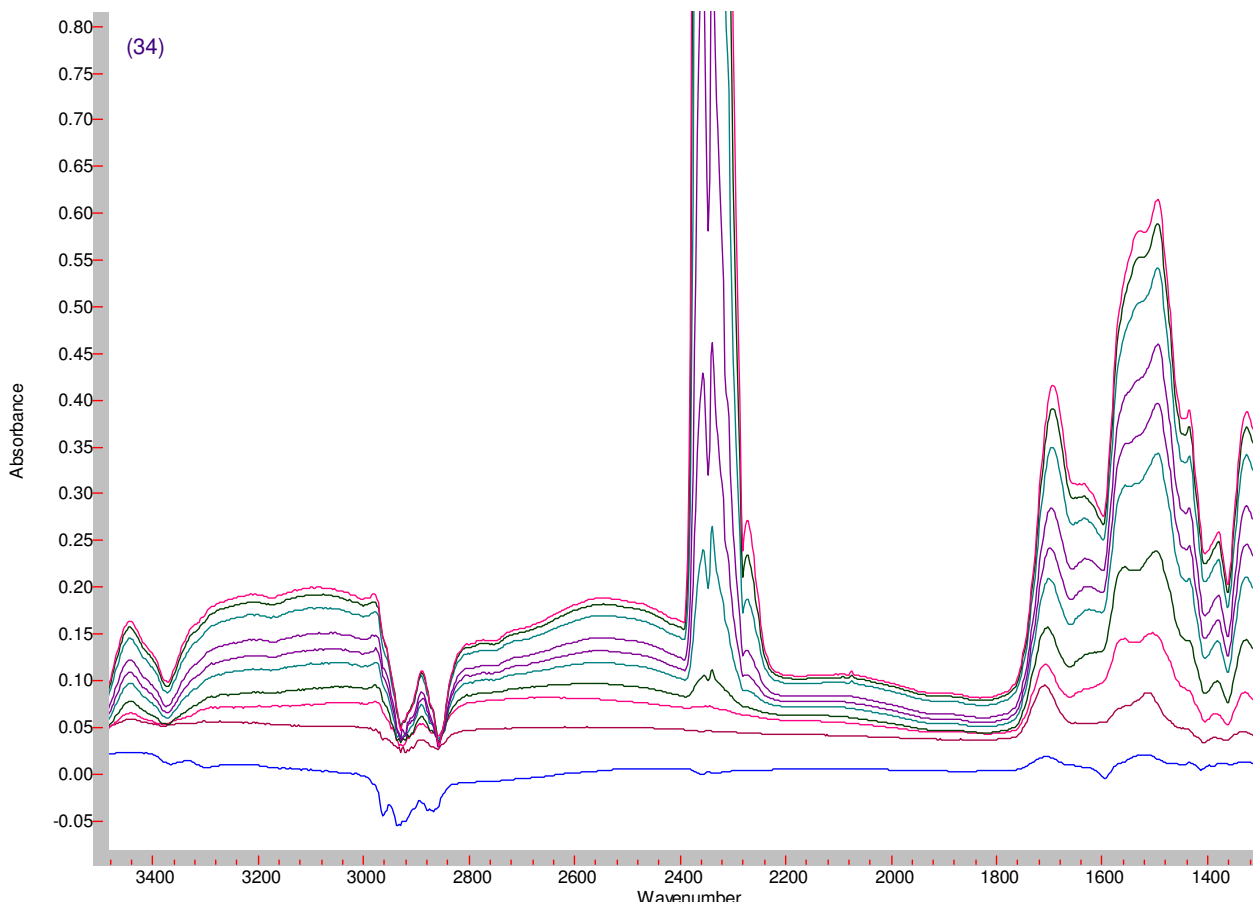

**Figure S8B. DESORPTION** MCM-48/APMDES DRY 20 % CO<sub>2</sub> in N<sub>2</sub> pressure 760, 600, 400, 200, 100, 50, 10, 1 Torr, 30 min evacuation, after heat treatment (from top to bottom)

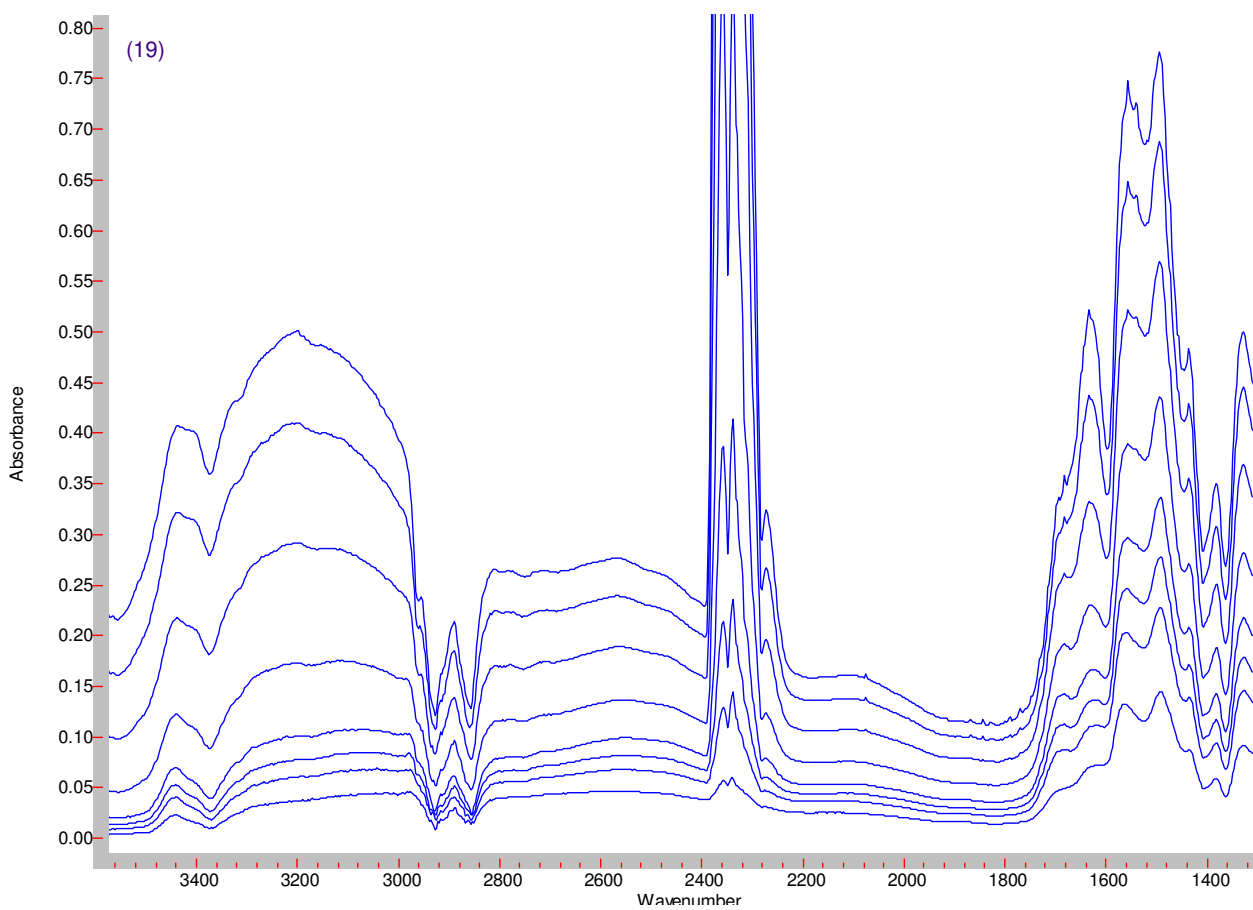

**Figure S8C. ADSORPTION MCM-48/APMDES HUMID 20 % CO<sub>2</sub> in N<sub>2</sub> pressure 8, 30, 54, 100, 200, 400, 600, 760 Torr (from bottom to top)**

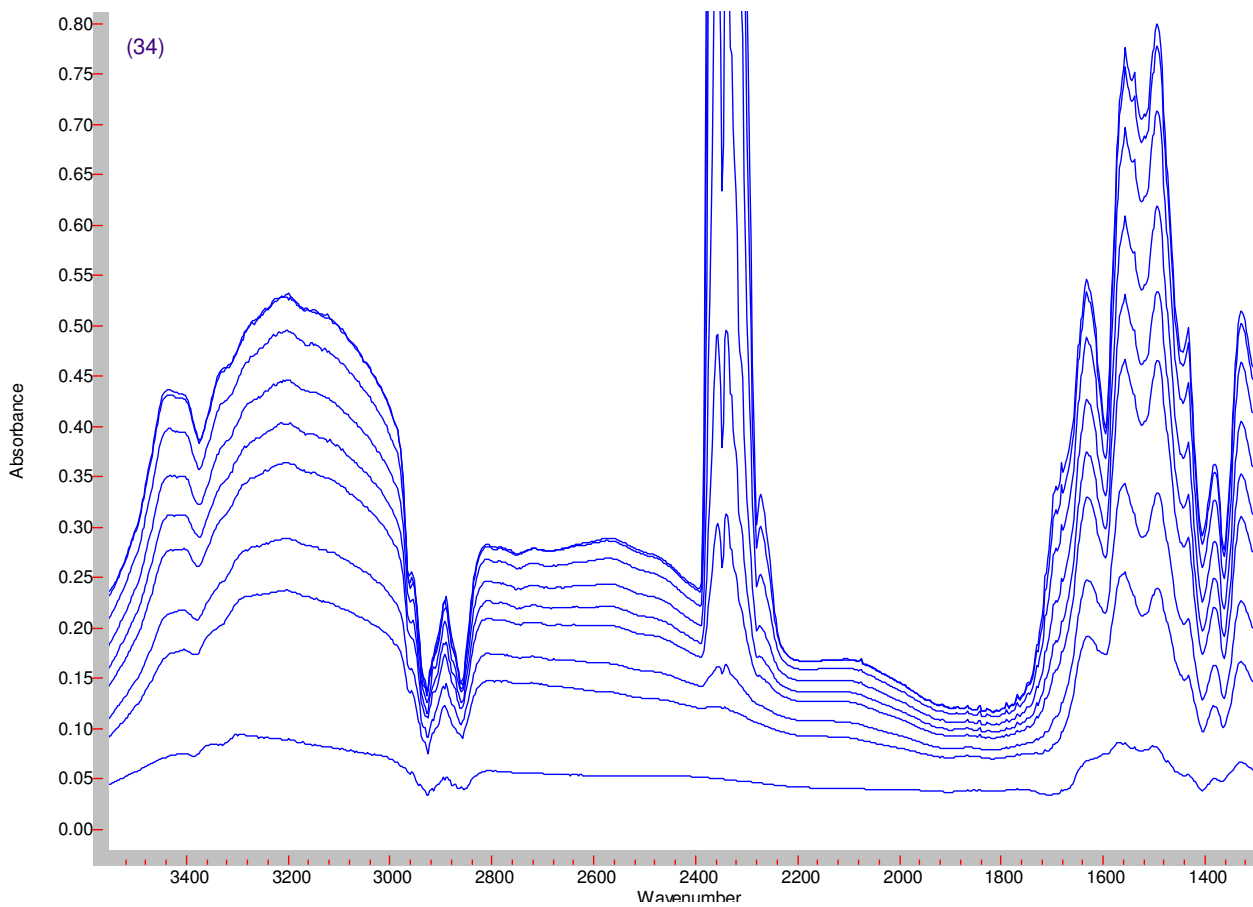

**Figure S8D. DESORPTION MCM-48/APMDES HUMID 20 % CO<sub>2</sub> in N<sub>2</sub> pressure 760, 600, 400, 200, 100, 50, 10, 1 Torr, 30 min evacuation, (from top to bottom)**

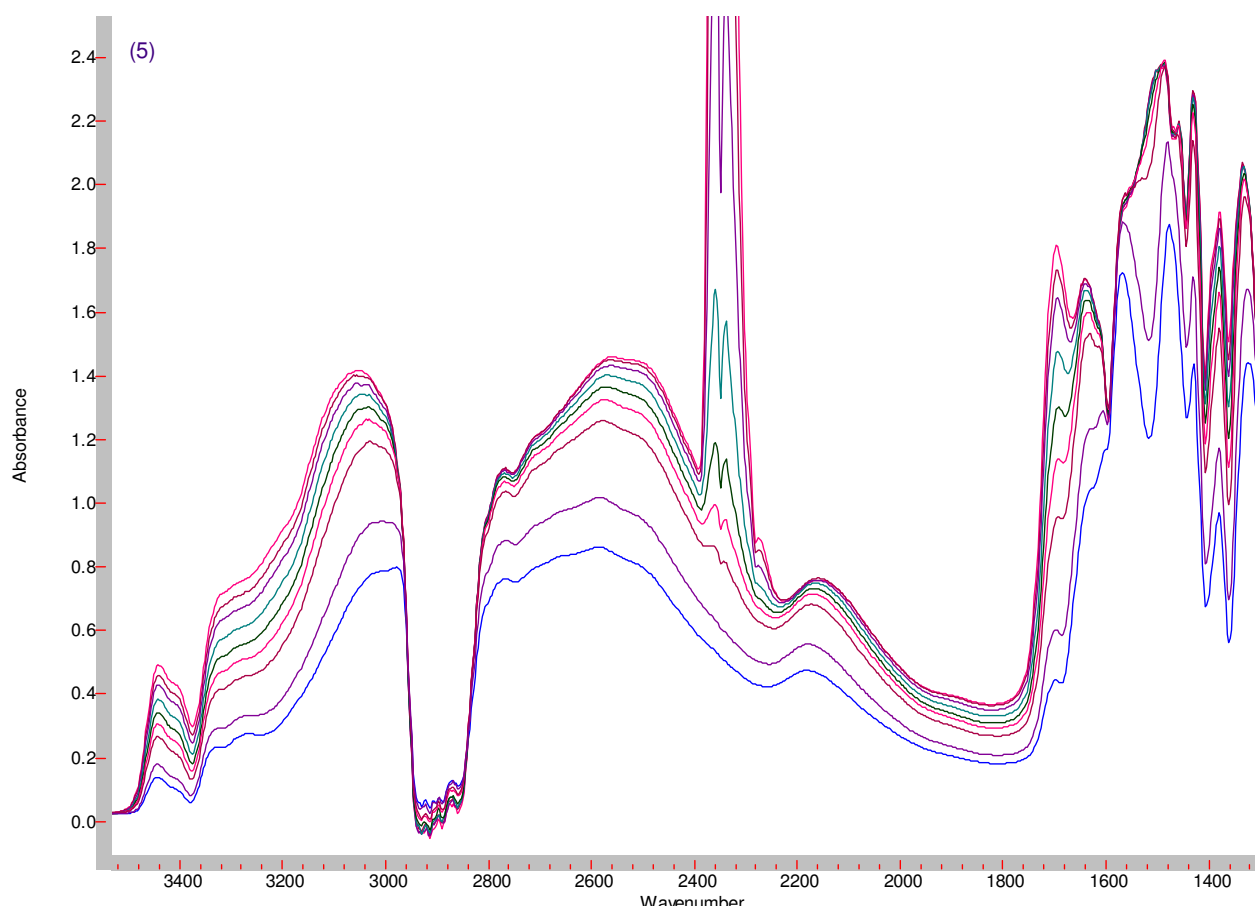

**Figure S9A. ADSORPTION AMS-6/APTES DRY 20 % CO<sub>2</sub> in N<sub>2</sub> pressure 5.6, 13, 27, 55, 100, 200, 400, 600, 760 Torr (from bottom to top)**

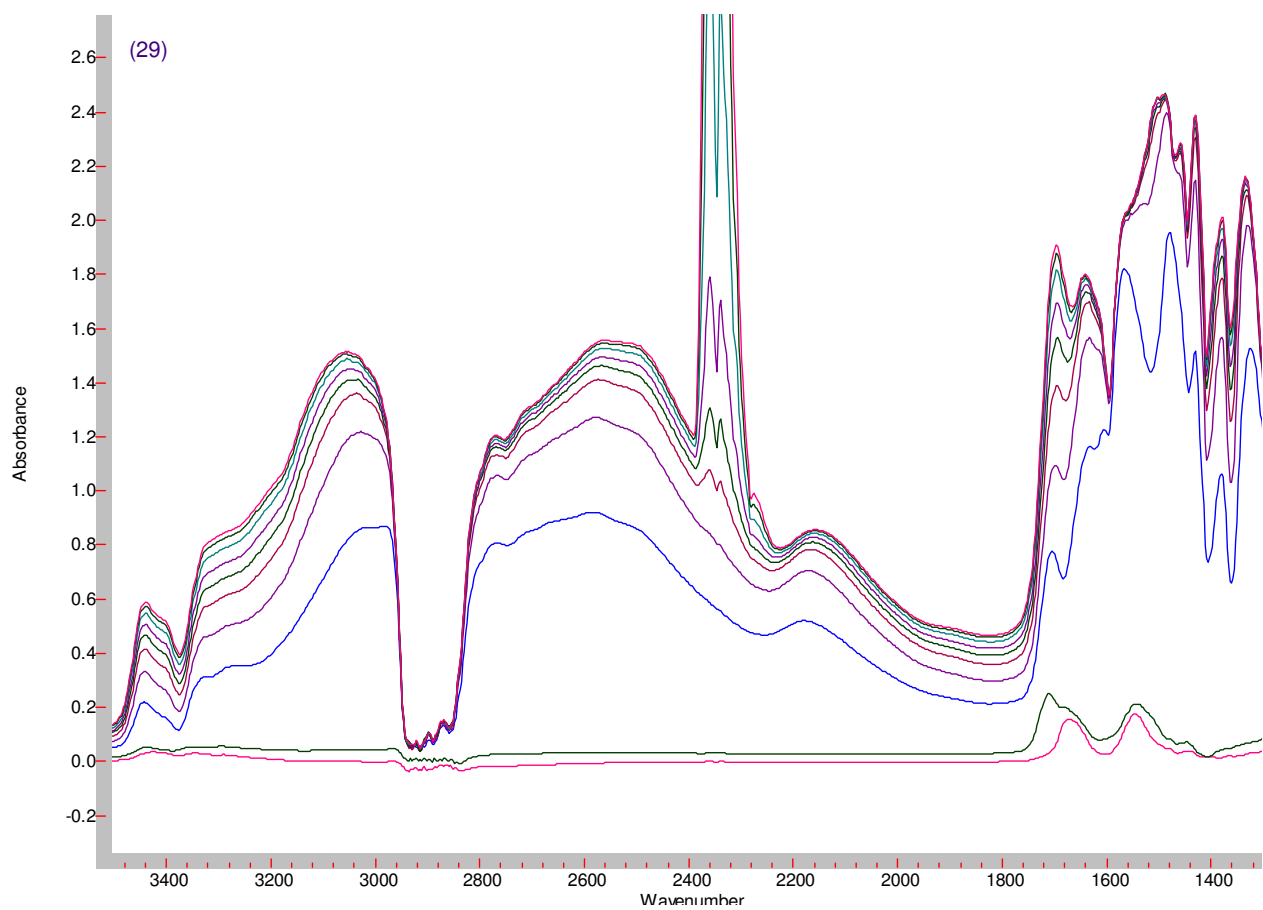

**Figure S9B. DESORPTION AMS-6/APTES DRY 20 % CO<sub>2</sub> in N<sub>2</sub> pressure 760, 600, 400, 200, 100, 50, 25, 10, 2 Torr, 30 min evacuation, heat treatment (from top to bottom)**

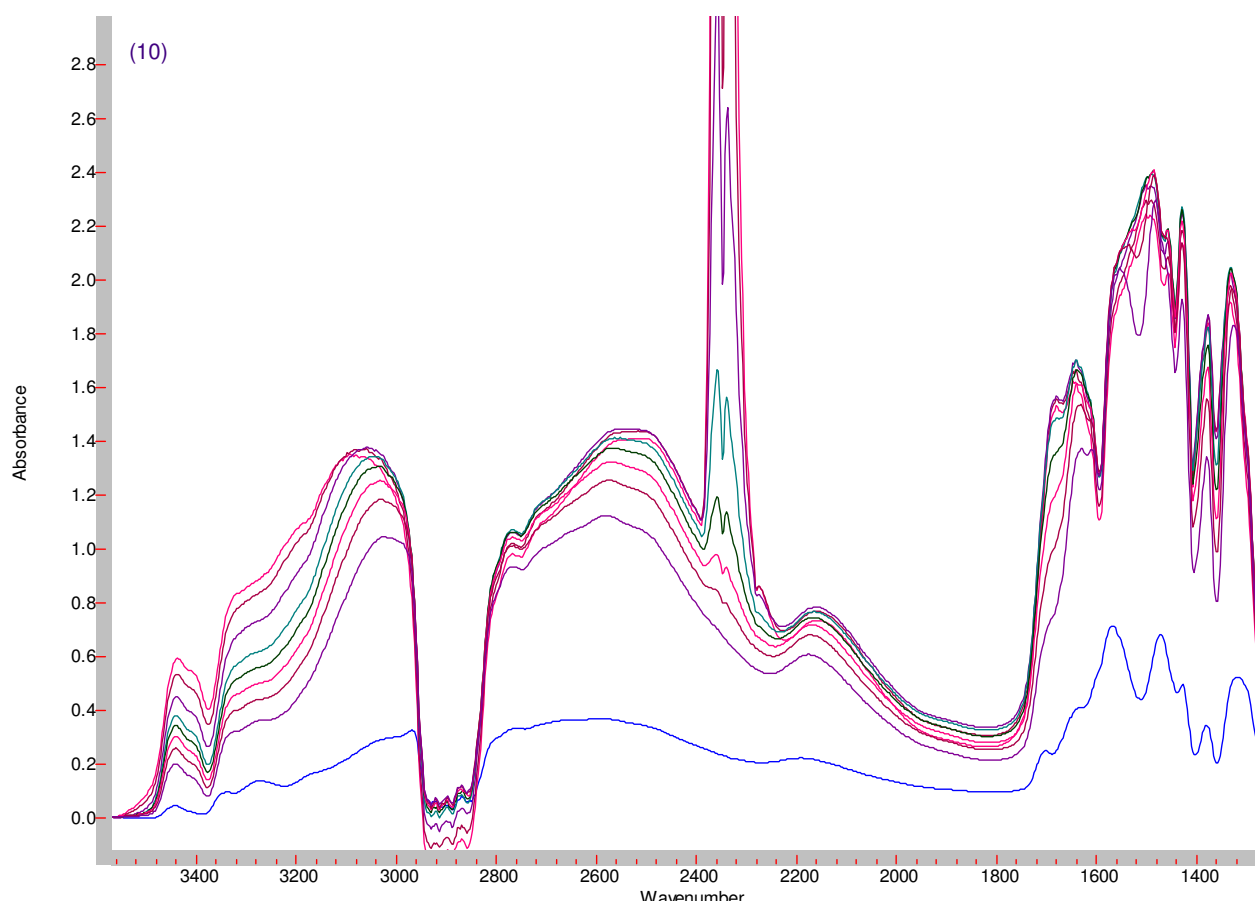

**Figure S9C. ADSORPTION AMS-6/APTES HUMID 20 % CO<sub>2</sub> in N<sub>2</sub> pressure 1, 10, 25, 50, 100, 200, 400, 600, 760 Torr (from bottom to top)**

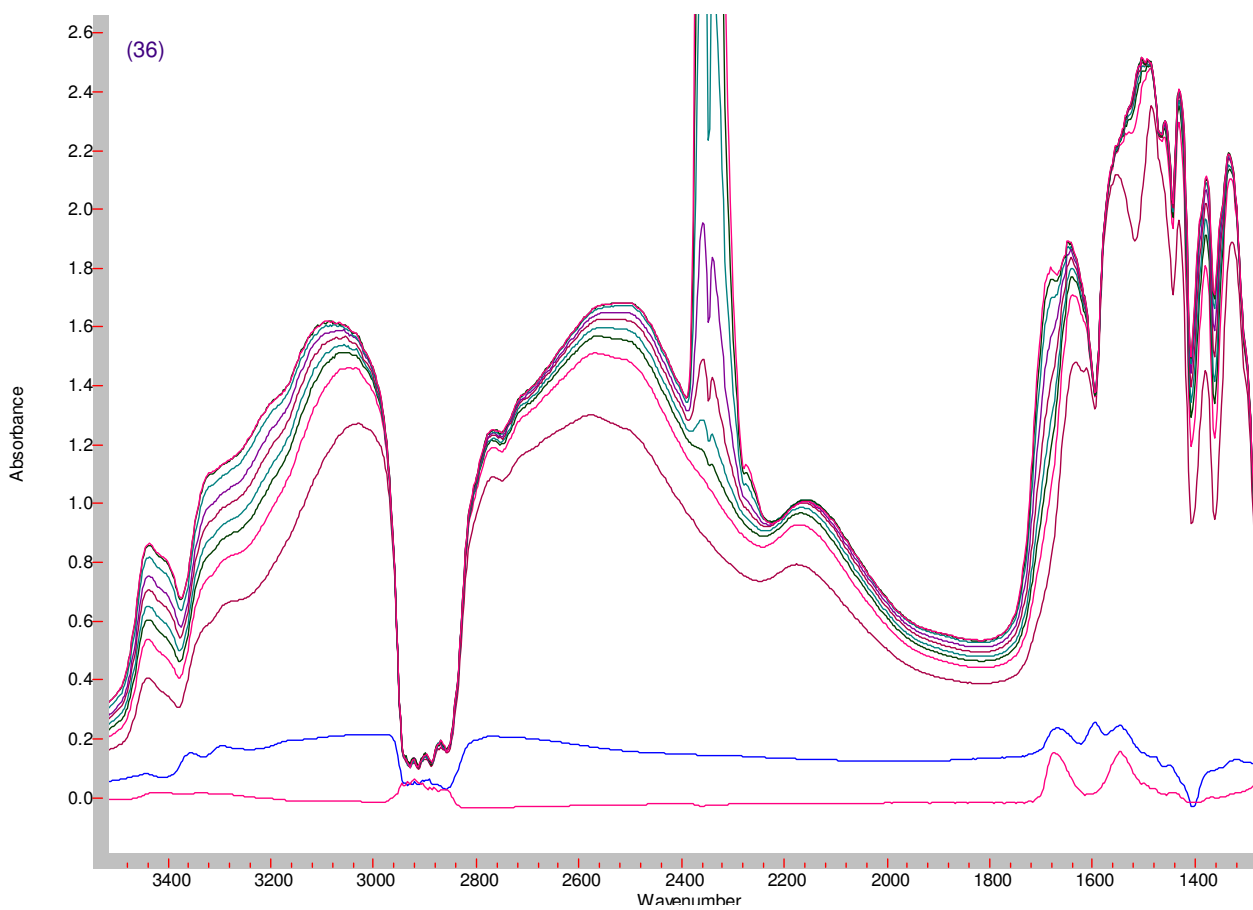

**Figure S9D. DESORPTION AMS-6/APTES HUMID 20 % CO<sub>2</sub> in N<sub>2</sub> pressure 760, 600, 400, 200, 100, 50, 24, 10, 1 Torr, 30 min evacuation, heat treatment (from top to bottom)**

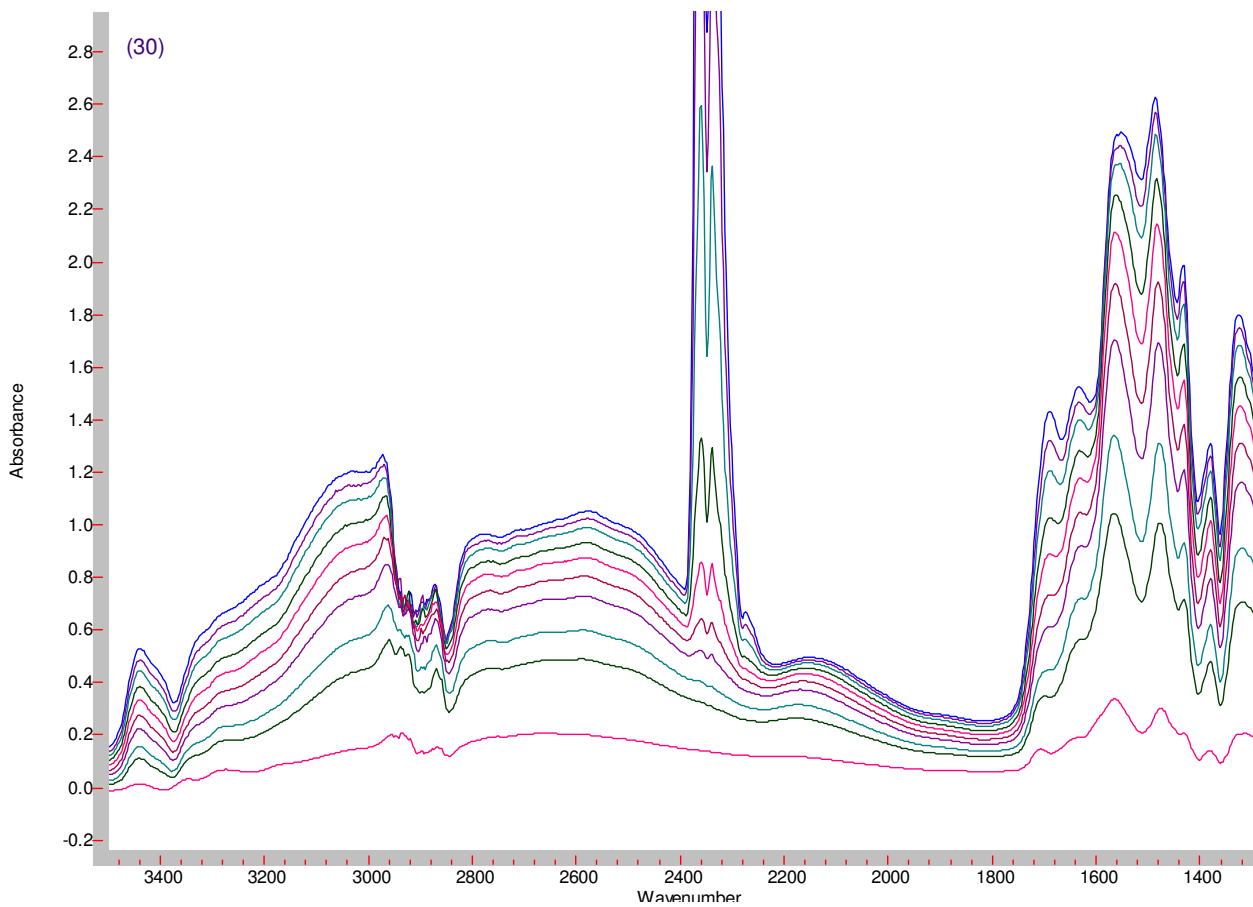

**Figure S10A. ADSORPTION MCM-48/APTES DRY 20 % CO<sub>2</sub> in N<sub>2</sub> pressure 1, 5, 10, 25, 50, 100, 200, 400, 600, 760 Torr (from bottom to top)**



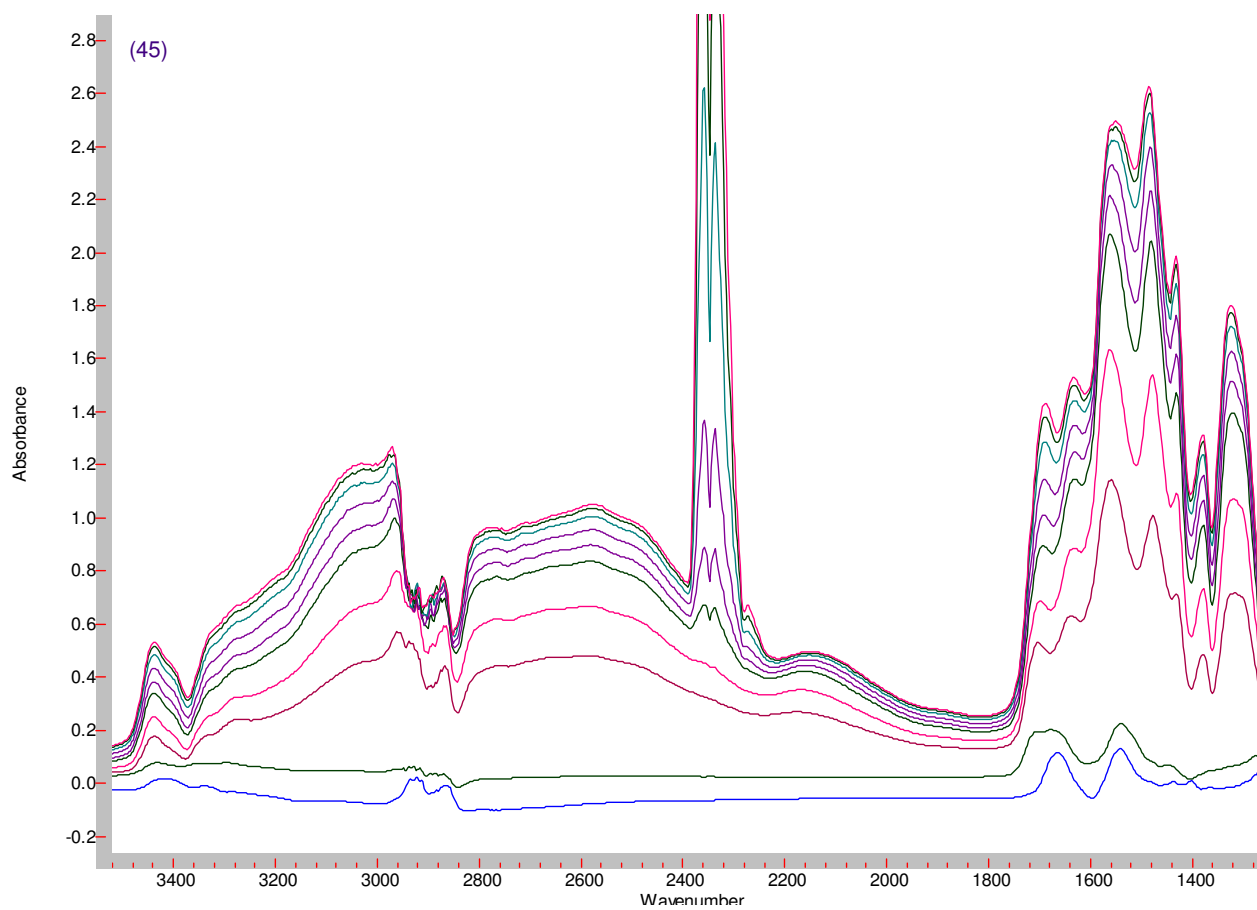

**Figure S10B. DESORPTION** MCM-48/APTES DRY 20 % CO<sub>2</sub> in N<sub>2</sub> pressure 760, 600, 400, 200, 100, 50, 10, 2 Torr, 30 min evacuation, heat treatment (from top to bottom)

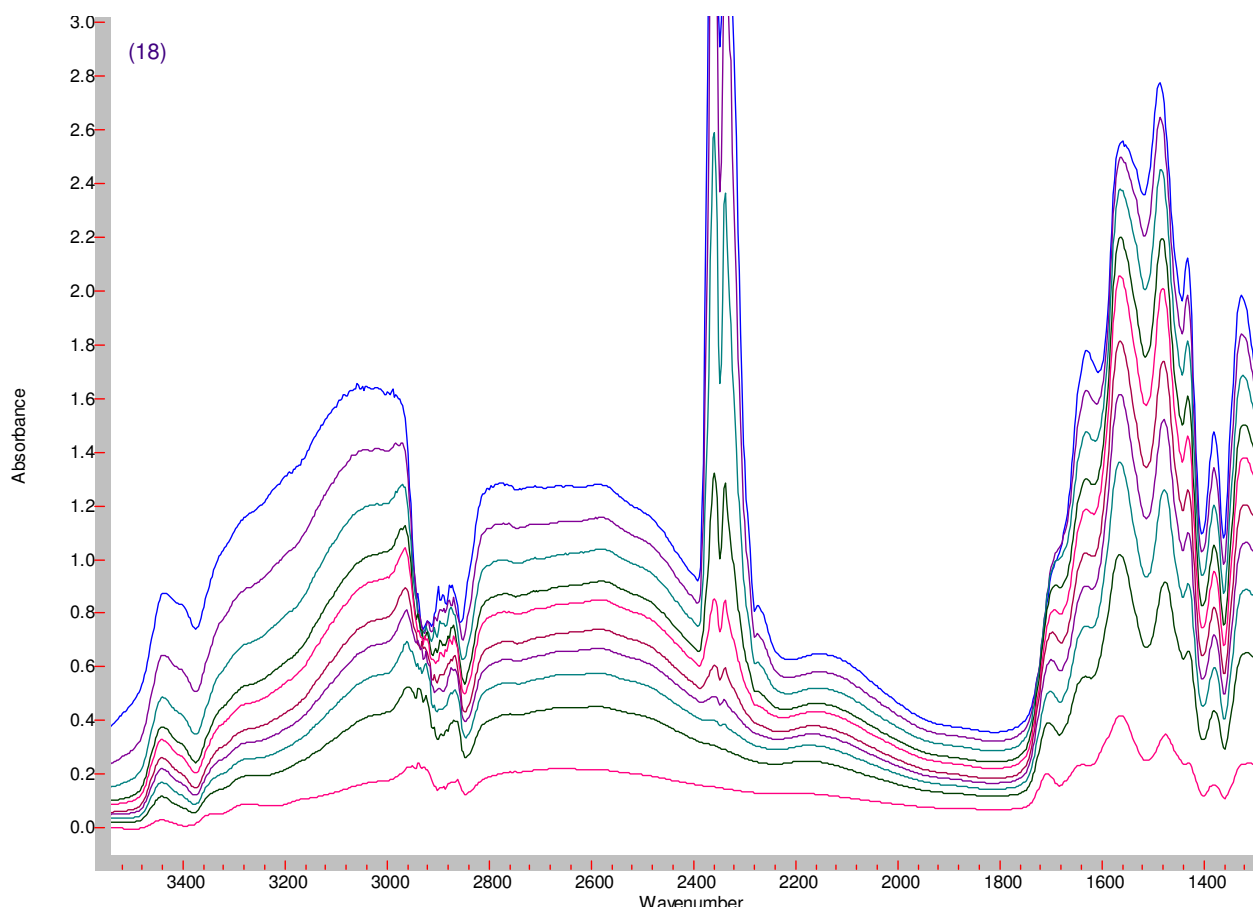

**Figure S10C. ADSORPTION MCM-48/APTES HUMID 20 % CO<sub>2</sub> in N<sub>2</sub> pressure 1, 5, 13, 25, 50, 100, 200, 400, 600, 760 Torr (from bottom to top)**

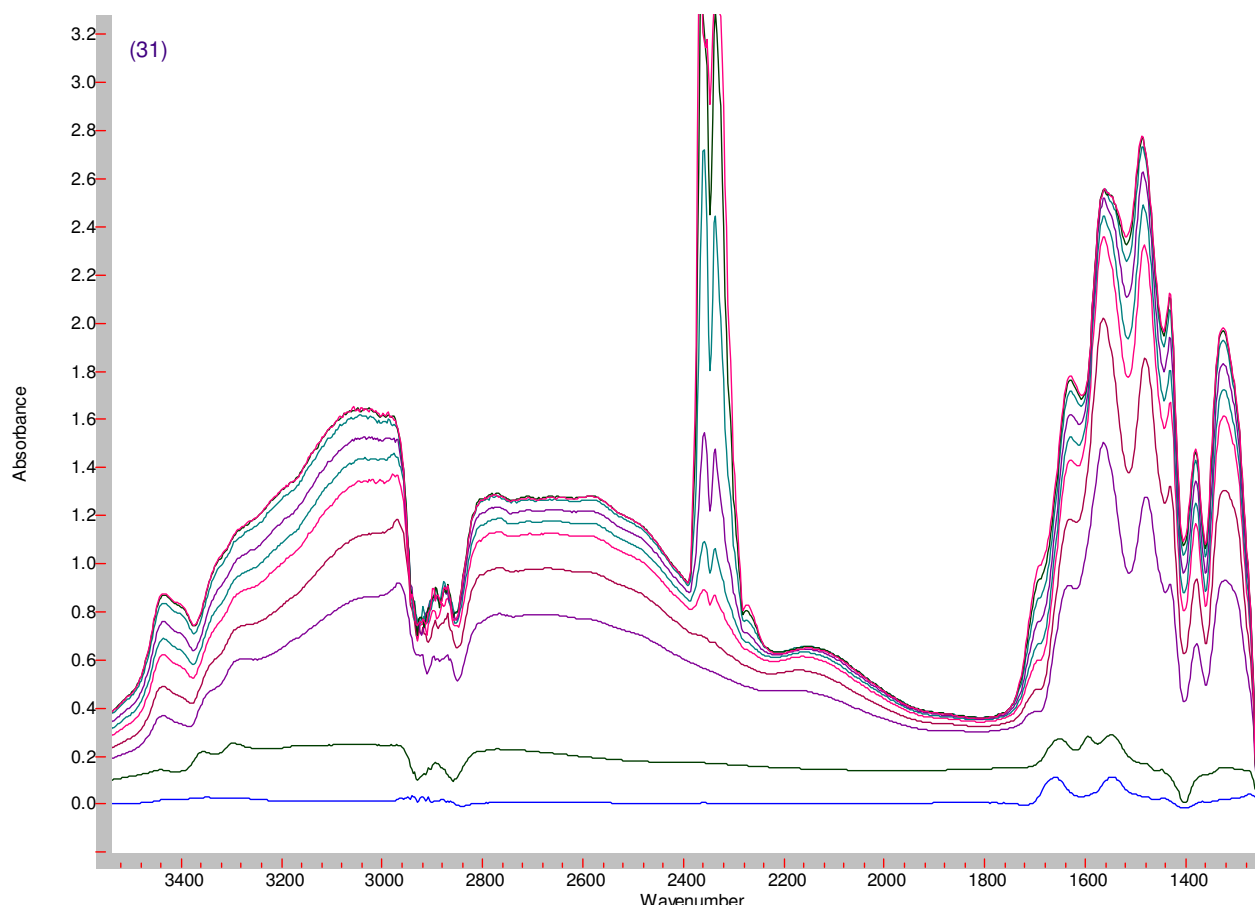

**Figure S10D. DESORPTION MCM-48/APTES HUMID 20 % CO<sub>2</sub> in N<sub>2</sub> pressure 760, 600, 400, 200, 100, 50, 10, 2 Torr, 30 min evacuation, heat treatment (from top to bottom)**

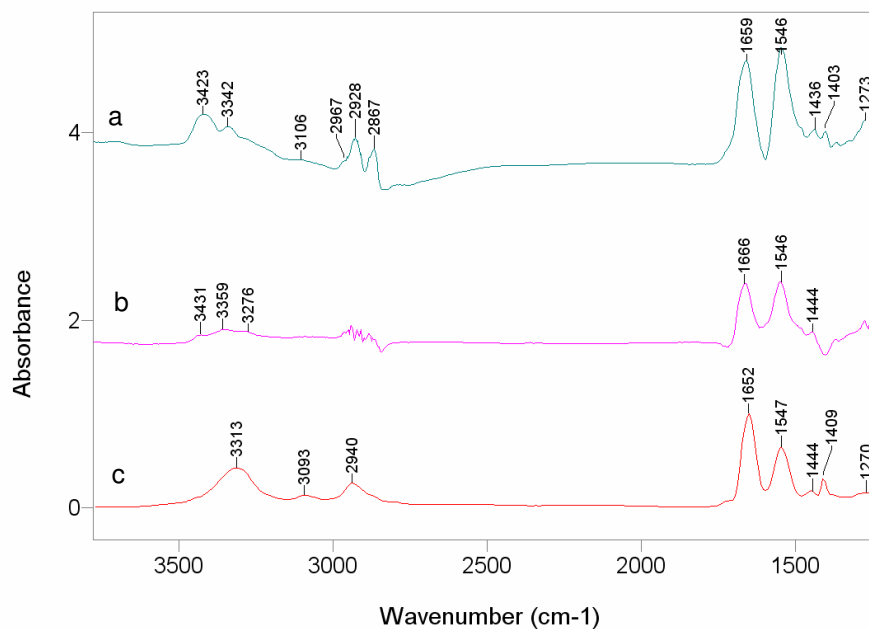

**Figure S11A.** The IR spectra of remained species on MCM-48/APTES after a) dry and b) moist CO<sub>2</sub> adsorption and heat (140 °C, 6h) regeneration; c) poly (N-methyl acryl amide) reference spectrum

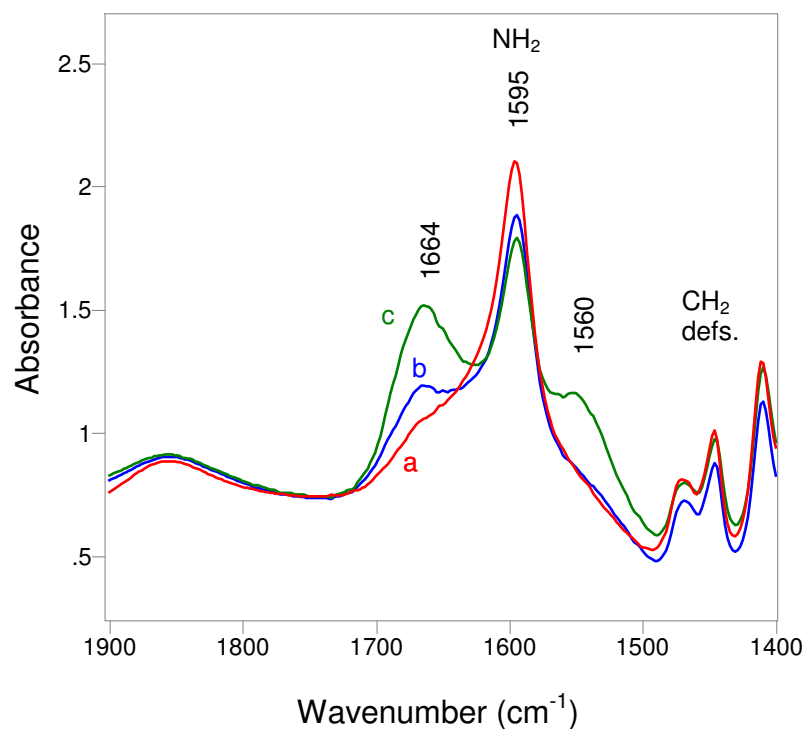

**Figure S11B.** IR spectra of the fresh (a) MCM-48/APTES and after 3 (b) and 6 (c) cycles of CO<sub>2</sub> uptake. A spectrum in from an empty cell was used when recording the single beam spectrum for further use as a background spectrum.

### References in the supplementary information

- Hicks, J. C.; Drese, J. H.; Fauth, D. J.; Gray, M. L.; Qi, G. G.; Jones, C. W. *J. Am. Chem. Soc.* **2008**, *130*, 2902-2903.
- Gray, M. L.; Soong, Y.; Champagne, K. J.; Pennline, H. W.; Baltrus, J.; Stevens Jr., R. W.; Khatri, R.; Chuang, S. S. C. *Int. J. Environ. Technol. Manage.* **2004**, *4*, 82-88.
- Chang, A. C. C.; Chuang, S. S. C.; Gray, M.; Soong, Y. *Energy Fuels* **2003**, *17*, 468-473.
- Harlick, P. J. E.; Sayari, A. *Ind. Eng. Chem. Res.* **2007**, *46*, 446-458.
- Serna-Guerrero, R.; Dana, E.; Sayari, A. *Ind. Eng. Chem. Res.* **2008**, *47*, 9406-9412.
- Danon, A.; Stair, P. C.; Weitz, E. *J. Phys. Chem. C* DOI: 10.1021/jp200914v
- Kim, S.; Ida, J.; Guliants, V. V.; Lin, J. Y. S. *J. Phys. Chem. B* **2005**, *109*, 6287-6293.
- Hiyoshi, N.; Yogo, K.; Yashima, T. *Microporous Mesoporous Mater.* **2005**, *84*, 357-365.
- Bacsik, Z.; Atluri, R.; Garcia-Bennett, A. E.; Hedin, N. *Langmuir* **2010**, *26*, 10013-10024.
- Knöfel, C.; Martin, C.; Hornebecq, V.; Llewellyn, P. L. *J. Phys. Chem. C* **2009**, *113*, 21726-21734.
- Tsuda, T.; Fujiwara, T.; Taketani, Y.; Saegusa, T. *Chem. Lett.* **1992**, 2161-2164.
- Chang, A. C. C.; Chuang, S. S. C.; Gray, M.; Soong, Y. *Energy Fuels* **2003**, *17*, 468-473.
- Khatri, R. A.; Chuang, S. S. C.; Soong, Y.; Gray, M. *Energy Fuels* **2006**, *20*, 1514-1520.
- Khatri, R. A.; Chuang, S. S. C.; Soong, Y.; Gray, M. *Ind. Eng. Chem. Res.* **2005**, *44*, 3702-3708.
- Fisher II, J. C.; Tanthana, J.; Chuang, S. S. C. *Environ. Prog. Sustainable Energy* **2009**, *28*, 589-598.
- Tanthana, J.; Chuang, S. S. C. *ChemSusChem* **2010**, *3*, 957-964.

Hao, S. Y.; Xiao, Q. A.; Yang, H.; Zhong, Y. J.; Pepe, F.; Zhu, W. D. *Microporous Mesoporous Mater.* **2010**, *132*, 552-558.

Leal, O.; Bolivar, C.; Ovalles, C.; Garcia, J. J.; Espidel, Y. *Inorg. Chim. Acta* **1995**, *240*, 183-189.

Huang, H. Y.; Yang, R. T.; Chinn, D.; Munson, C. L. *Ind. Eng. Chem. Res.* **2003**, *42*, 2427-2433.

Wang, X. X.; Schwartz, V.; Clark, J. C.; Ma, X. L.; Overbury, S. H.; Xu, X. C.; Song, C. S. *J. Phys. Chem. C* **2009**, *113*, 7260-7268.

Zheng, F.; Tran, D. N.; Busche, B. J.; Fryxell, G. E.; Addleman, R. S.; Zemanian, T. S.; Aardahl, C. L. *Ind. Eng. Chem. Res.* **2005**, *44*, 3099-3105.
